# Supplementary material for: α-Conotoxins Enhance both the In Vivo Suppression of Ehrlich carcinoma Growth and In Vitro Reduction in Cell Viability Elicited by Cyclooxygenase and Lipoxygenase Inhibitors
Source: PubMed Central journal article supplement (PMC7230841; doi:10.3390/md18040193), 2020-04-07
Supplement: marinedrugs-18-00193-s001.pdf [file marinedrugs-18-00193-s001.pdf]

# Supplementary Materials

## $\alpha$ -Conotoxins Enhance both the In Vivo Suppression of Ehrlich carcinoma Growth and In Vitro Reduction in Cell Viability Elicited by Cyclooxygenase and Lipoxygenase Inhibitors

Alexey V. Osipov <sup>1</sup>, Tatiana I. Terpinskaya <sup>2</sup>, Tatsiana Yanchanka <sup>2</sup>, Tatjana Balashevich <sup>2</sup>, Maxim N. Zhmak <sup>1</sup>, Victor I. Tsetlin <sup>1</sup> and Yuri N. Utkin <sup>1\*</sup>

<sup>1</sup> Shemyakin-Ovchinnikov Institute of Bioorganic Chemistry, Russian Academy of Sciences, ul. Miklukho-Maklaya 16/10, Moscow 117997, Russia; [osipov-av@ya.ru](mailto:osipov-av@ya.ru) (A.V.O.); [mzhmak@gmail.com](mailto:mzhmak@gmail.com) (M.N.Z.); [victortsetlin3f@gmail.com](mailto:victortsetlin3f@gmail.com) (V.I.T.)

<sup>2</sup> Institute of Physiology, National Academy of Sciences of Belarus, ul. Akademicheskaya, 28, Minsk 220072, Belarus; [terpinskayat@mail.ru](mailto:terpinskayat@mail.ru) (T.I.T.); [tanyaya190@gmail.com](mailto:tanyaya190@gmail.com) (T.Y.); [tbalashevich@bk.ru](mailto:tbalashevich@bk.ru) (T.B.)

\* Correspondence: [utkin@mx.ibch.ru](mailto:utkin@mx.ibch.ru); [yutkin@yandex.ru](mailto:yutkin@yandex.ru); Tel: +7 495 3366522

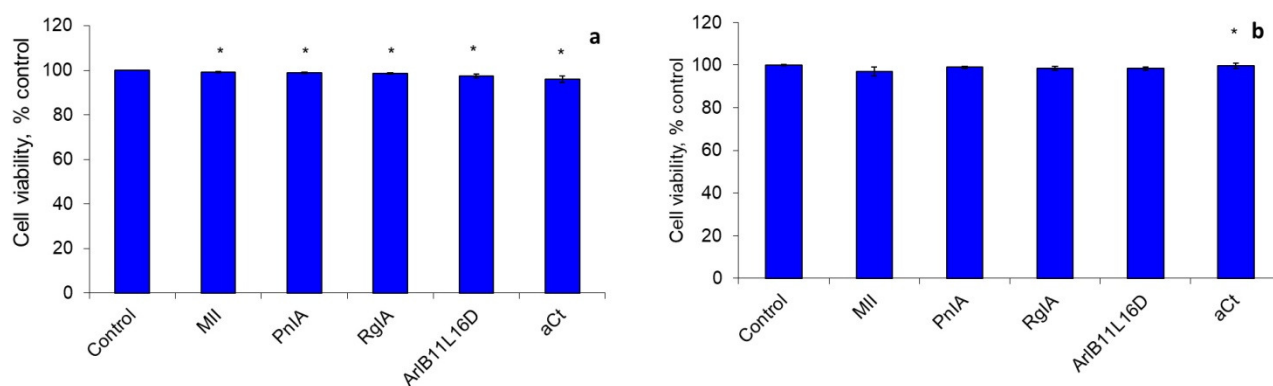

**Figure 1.** The effect of nAChR blockers on the viability of EAC cells in 24 h, n = 55 (a) and 48 h, n = 45 (b) in vitro; \* P < 0.05 when compared with control. aCt here and below is  $\alpha$ -cobratoxin.

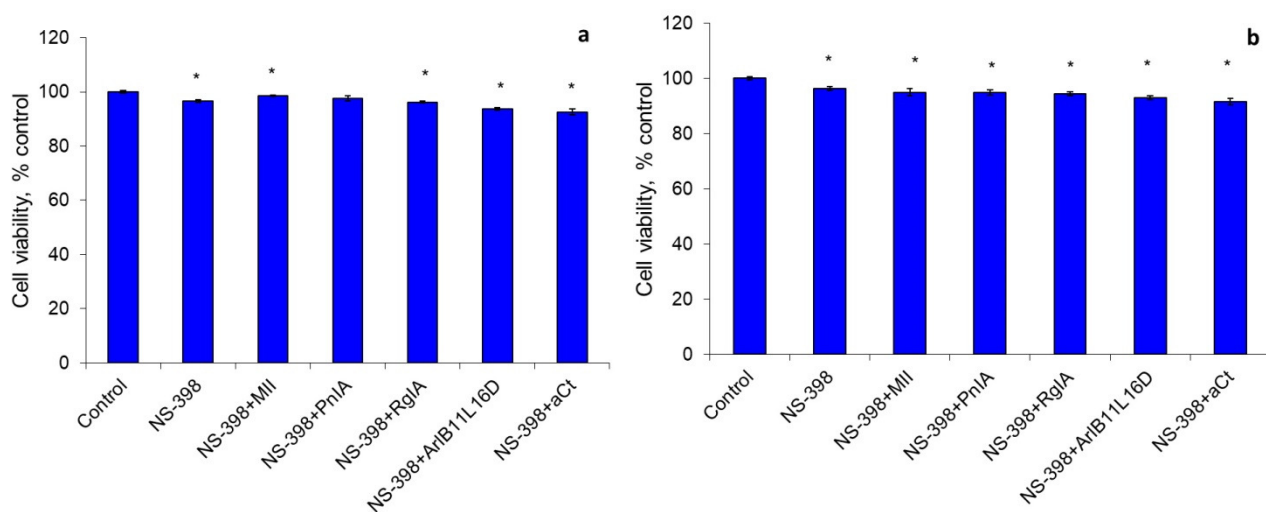

**Figure 2.** The effect of NS-398 and nAChR blockers on the viability of EAC cells in 24 h and 48 h (b) in vitro; \* P < 0.05 when compared with control.

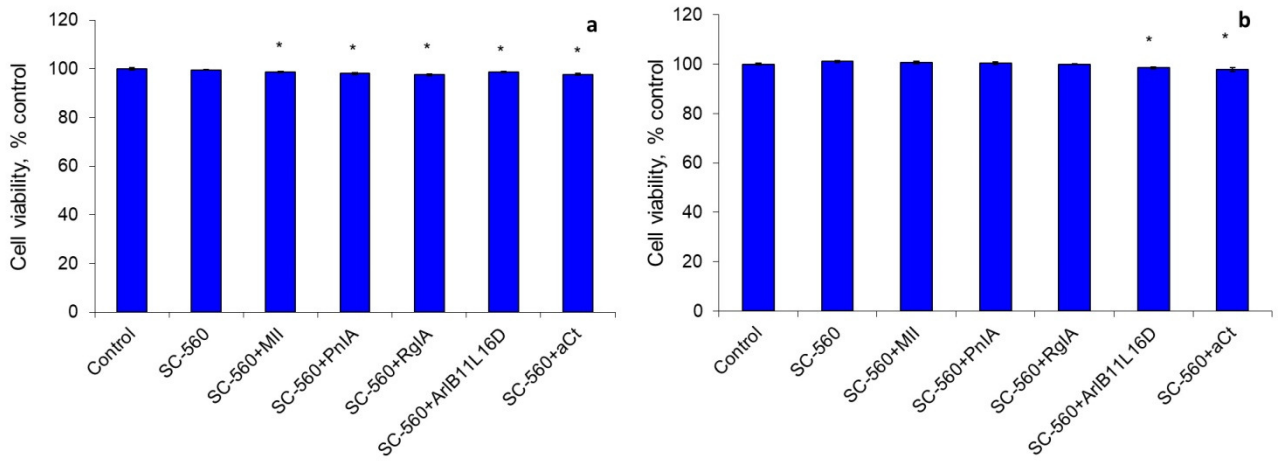

**Figure 3.** The effect of SC-560 and nAChR blockers on the viability of EAC cells in 24 h and 48 h (b) in vitro; \* P < 0.05 when compared with control.

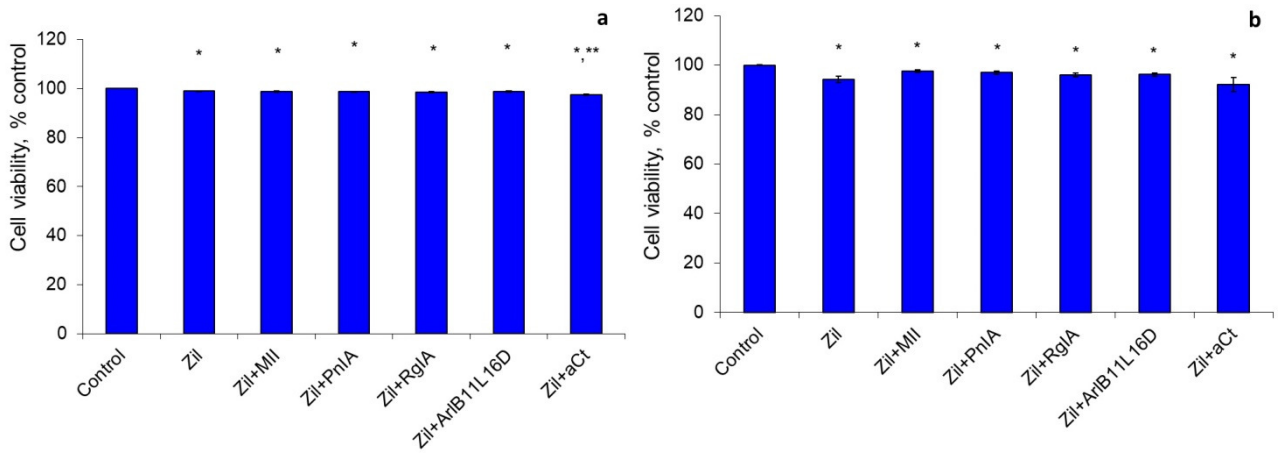

**Figure 4.** The effect of zileuton (Zil) and nAChR blockers on the viability of EAC cells in 24 h, n = 25 (a) and 48 h, n = 20 (b) in vitro; \* P < 0.05 when compared with control; \*\* P < 0.05 when compared with the series " Zil ".
